# Supplementary material for: The properties of potato gluten-free doughs: comparative and combined effects of propylene glycol alginate and hydroxypropyl methyl cellulose or flaxseed gum
Source: publisher site journal article supplement (doi:10.1515/ijfe-2022-0227), 2023-02-01
Supplement: Supplementary file 1 [file j_ijfe-2022-0227_suppl_001.docx]

**Graphic abstract**


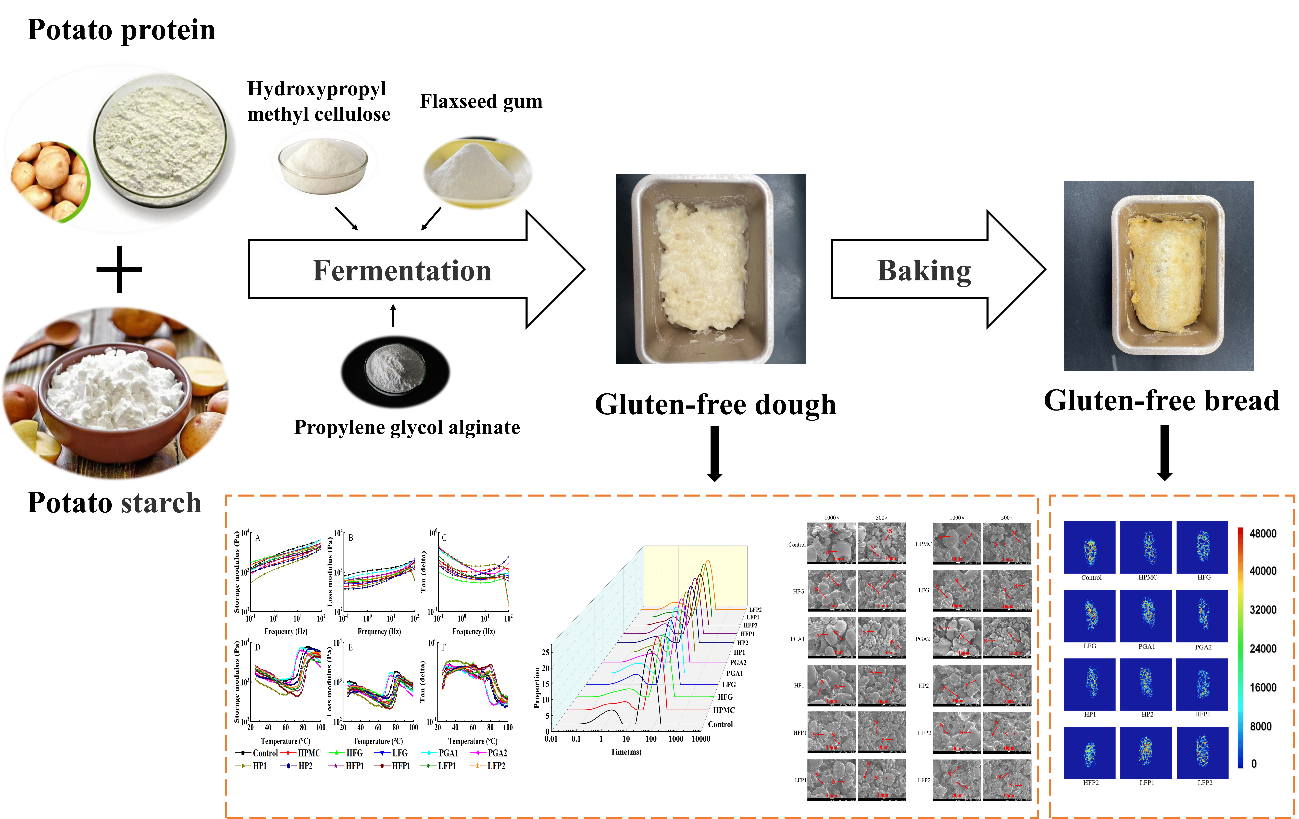


Potato GF dough, which prepared with potato starch and potato protein, adding the binary blends of propylene glycol alginate (PGA), with hydroxypropyl methyl cellulose (HPMC) or flaxseed gum (FG) are investigated from dough characteristic and bread quality.
